# Supplementary material
Source: Elsevier journal article supplement (https://www.sciencedirect.com/science/article/pii/S0213911114002489)
Supplement: mmc1 [file S0213911114002489:mmc1.pdf]

- Nombre:
- NSS/NUHSA:

## INTERRUPCIÓN VOLUNTARIA DEL EMBARAZO Y USO DE MÉTODOS ANTICONCEPTIVOS EN MUJERES QUE EJERCEN LA PROSTITUCIÓN EN ALMERÍA.

1. Lugar de origen:
2. Edad (años):
3. Convivencia actual (marcar con una "x"):
  - Sola
  - Acompañada (familiares, amigos, compañeros/as)
4. Modo de vida (marcar con una "x"):
  - Vivienda alquilada
  - Vivienda comprada
  - Okupa
  - Otro
5. Historia reproductiva (marcar con una "x"):
  - Alguna gestación a término
  - Algún aborto espontáneo
  - Alguna IVE
  - Ninguna gestación
6. ¿Tiene hijos? (marcar con una "x")
  - Sí, ¿cuántos?:
  - NoEn caso afirmativo, ¿viven con ella? (marcar con una "x"):
  - Sí
  - No
7. Nivel de estudios (marcar con una "x"):
  - Primarios completos
  - Primarios incompletos
  - Secundarios
  - Universitarios
8. Tiempo de ejercicio en la prostitución (años):
9. Usó **siempre** preservativo en sus relaciones vaginales (marcar con una "x"):
  - Sí
  - No
10. Uso de otros métodos anticonceptivos (marcar con una "x"):
  - Sí
  - NoEn caso afirmativo, ¿qué método? (marcar con una "x"):
  - Anovulatorio oral
  - Anovulatorio en parche
  - Anovulatorio subcutáneo
  - Anillo vaginal
  - Ligadura de trompas
  - Vasectomía
  - Espermicida

11. Rotura del preservativo alguna vez (marcar con una "x"):

- ☐ Sí
- ☐ No

En caso de rotura, ¿tomó la píldora post-coital (anticoncepción de emergencia)? marcar con una "x":

- ☐ Sí
- ☐ No
